# Supplementary material for: Migrant Farmworkers’ Exposure to Pesticides in Sonora, Mexico
Source: MDPI journal article supplement (doi:10.3390/ijerph15122651), 2018-11-26
Supplement: s1 [file s1]

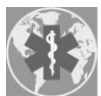

# Supplementary Materials: Migrant Farmworkers' Exposure to Pesticides in Sonora, Mexico

Nicolás López-Gálvez \*, Rietta Wagoner , Paloma Beamer , Jill de Zapien and Cecilia Rosales

Mel and Enid Zuckerman College of Public Health, University of Arizona, 1295 N. Martin Ave. PO 245210, Tucson, AZ 85724, USA

; rwagoner@email.arizona.edu (R.W.); pbeamer@email.arizona.edu (P.B.); dezapien@email.arizona.edu (J.d.Z.); crosales@email.arizona.edu (C.R.)

\* Correspondence: lopezgalvez@email.arizona.edu; Tel.: +01-619-718-0794

Received: 3 November 2018; Accepted: 20 November 2018; Published: 26 November 2018

In Figures S1 and S2, our findings suggest that TCPY, PNP, and 3PBA urine concentrations seem to be higher than among Mexican Americans ( $n = 602$ ) obtained from NHANES 2009–2010. 4F3PBA and t-DCCA were detected in our study, but not in the Mexican Americans.

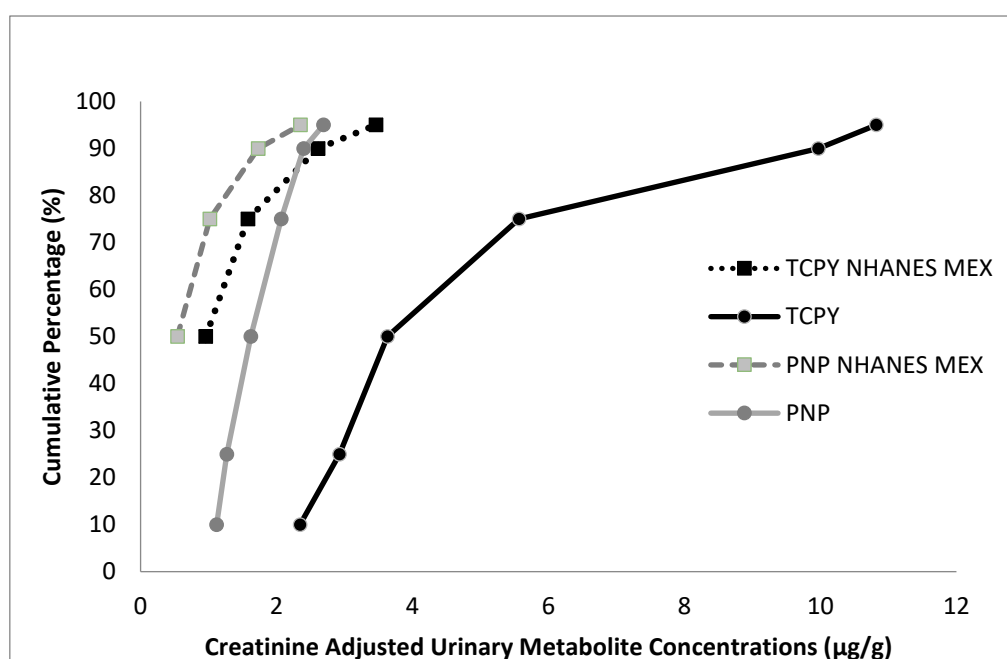

**Figure S1.** Organophosphate urine metabolite concentrations in migrant grape workers of Sonora, Mexico, compared to the Mexican American population ( $N = 602$ ) from NHANES 2009–2010. Abbreviations: TCPY NHANES MEX: urinary 3,5,6-trichloro-2-pyridinol concentrations from the Mexican-American population of the NHANES 2009–2010; TCPY: urinary 3,5,6-trichloro-2-pyridinol concentrations from participants in this study, PNP NHANES MEX: urinary para-nitrophenol concentrations from the Mexican-American population of the NHANES 2009–2010, PNP: urinary para-nitrophenol concentrations from participants in this study.

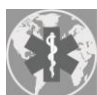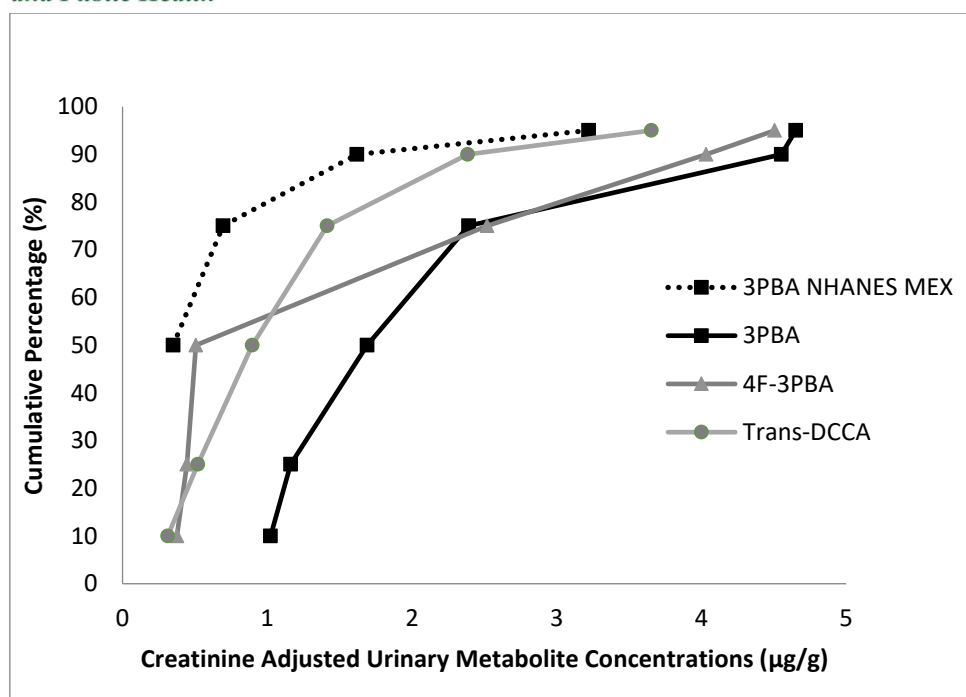

**Figure S2.** Pyrethroid urine metabolite concentrations in migrant grape workers of Sonora, Mexico, compared to the Mexican American population ( $N = 602$ ) from NHANES 2009–2010. Abbreviations: 4F3PBA: 4-fluoro-3-phenoxybenzoic acid; 3PBA: 3-phenoxybenzoic acid; Trans-DCCA: trans-3-(2,2-dichlorovinyl)-2,2-dimethylcyclopropane carboxylic acid. Note: the metabolite concentrations for 4F3PBA and t-DCCA found in this study were not detected in NHANES ( $< \text{LOD}$ ).

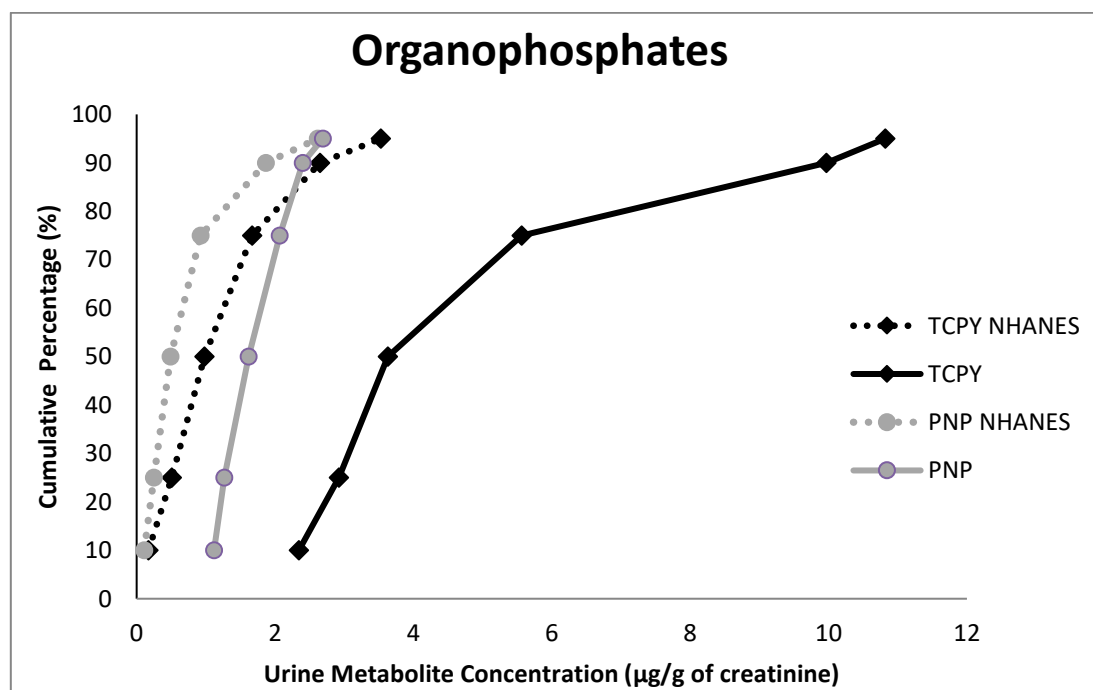

**Figure S3.** Organophosphate urine metabolite concentrations in migrant grape workers of Sonora, Mexico, compared to the total population ( $N = 2,747$ ) from NHANES 2009–2010. Abbreviations: TCPY: 3,5,6-trichloro-2-pyridinol; PNP: para-nitrophenol.

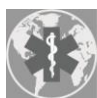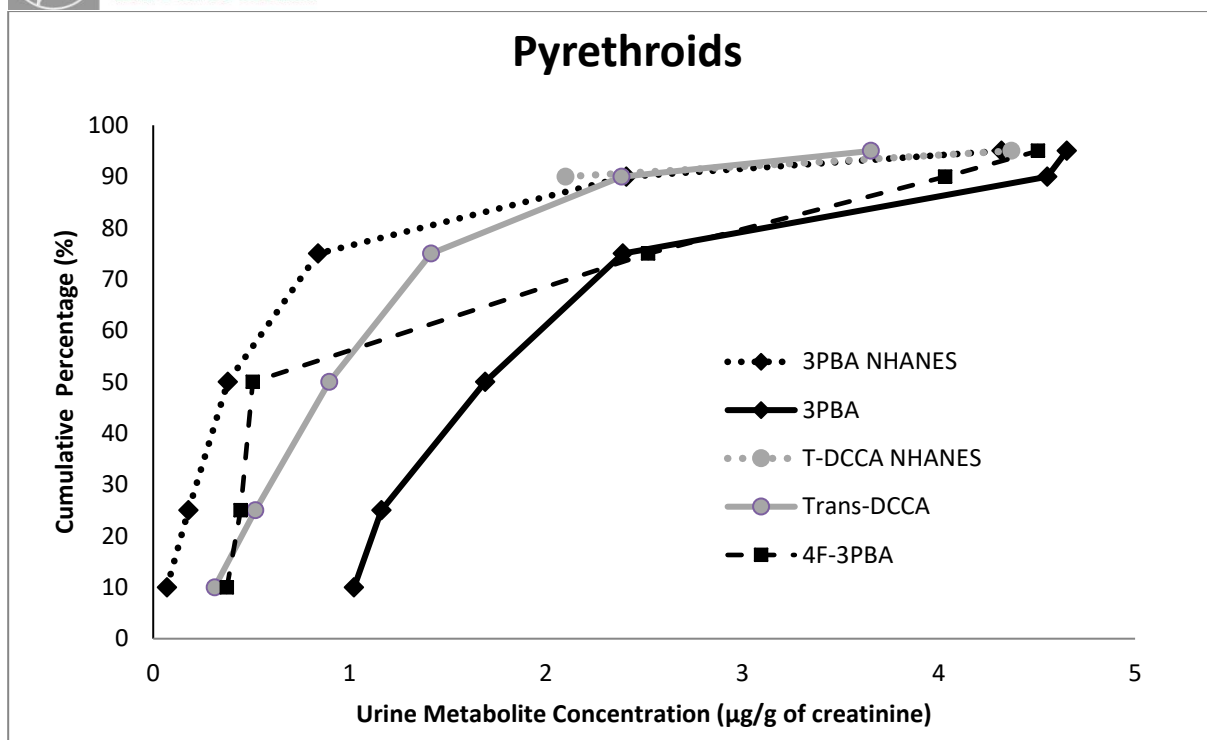

**Figure S4.** Pyrethroid urine metabolite concentrations in migrant grape workers of Sonora, Mexico, compared to the with NHANES 2009 -2010 total population ( $N = 2,747$ ). Abbreviations: 4F3PBA: 4-fluoro-3-phenoxybenzoic acid; 3PBA: 3-phenoxybenzoic acid; t-DCCA: trans-3-(2,2-dichlorovinyl)-2,2-dimethylcyclopropane carboxylic acid. Note: the metabolite concentrations for 4F3PBA found in this study were not detected in NHANES ( $< \text{LOD}$ ).

As presented in Figure S3 , the organophosphates urine metabolite concentrations in our study were higher than the total U.S. population. The urine concentration distributions in our pilot study were significantly higher than NHANES 2009-2010 for TCPY (KS-test = 0.808,  $p < 0.001$ ), and PNP (KS-test = 0.789,  $p < 0.001$ ). As presented in Figure S4, the pyrethroids distributions of the urine concentrations found in our study were significantly higher than NHANES for 3PBA (KS-test = 0.738,  $p < 0.001$ ), t-DCCA (KS-test = 0.378,  $p < 0.001$ ). In addition, the urine metabolite of cyfluthrin (F3PBA) was only detected in our study, but not in the NHANES 2009-2010 U.S. population.
